# Supplementary material
Source: PubMed Central journal article supplement (PMC3151442)
Supplement: supp_jn.108.096362_nut096362ST01-ST03.pdf [file supp_jn.108.096362_nut096362ST01-ST03.pdf]

**SUPPLEMENTAL TABLE 1**

The absolute weights of tissues in 31-wk-old rats at the end of a 12-wk period of consuming low-fat or high-fat diet and water containing either 1.51% L-arginine-HCl or 2.55% L-alanine <sup>1</sup>

| Tissues                      | Absolute weight            |                            |                            |                            | P value |       |           |
|------------------------------|----------------------------|----------------------------|----------------------------|----------------------------|---------|-------|-----------|
|                              | LF-Ala <sup>2</sup>        | LF-Arg                     | HF-Ala                     | HF-Arg                     | Diet    | AA    | Diet x AA |
|                              | g                          | g                          | g                          | g                          |         |       |           |
| Heart                        | 1.67 ± 0.07 <sup>b</sup>   | 1.71 ± 0.07 <sup>b</sup>   | 2.05 ± 0.10 <sup>a</sup>   | 1.94 ± 0.10 <sup>a</sup>   | <0.01   | 0.66  | 0.36      |
| Lungs                        | 1.73 ± 0.04 <sup>b</sup>   | 1.76 ± 0.08 <sup>b</sup>   | 2.13 ± 0.06 <sup>a</sup>   | 2.08 ± 0.07 <sup>a</sup>   | <0.01   | 0.86  | 0.53      |
| Liver                        | 12.9 ± 0.83 <sup>b</sup>   | 12.1 ± 0.47 <sup>b</sup>   | 14.8 ± 0.52 <sup>a</sup>   | 13.6 ± 0.56 <sup>a</sup>   | <0.01   | 0.12  | 0.82      |
| Spleen                       | 0.84 ± 0.04                | 0.80 ± 0.03                | 0.89 ± 0.02                | 0.88 ± 0.04                | 0.06    | 0.47  | 0.62      |
| Kidneys                      | 2.85 ± 0.10 <sup>b</sup>   | 2.85 ± 0.08 <sup>b</sup>   | 3.13 ± 0.06 <sup>a</sup>   | 3.04 ± 0.10 <sup>a</sup>   | 0.01    | 0.62  | 0.61      |
| RP adipose tissue            | 7.41 ± 0.69 <sup>b</sup>   | 4.51 ± 0.33 <sup>c</sup>   | 11.2 ± 1.34 <sup>a</sup>   | 7.44 ± 0.46 <sup>b</sup>   | <0.01   | <0.01 | 0.62      |
| EP adipose tissue            | 7.45 ± 0.63 <sup>c</sup>   | 5.89 ± 0.33 <sup>d</sup>   | 11.0 ± 0.86 <sup>a</sup>   | 8.79 ± 0.60 <sup>b</sup>   | <0.01   | <0.01 | 0.64      |
| SC adipose tissue            | 6.78 ± 0.46 <sup>c</sup>   | 4.54 ± 0.27 <sup>d</sup>   | 13.3 ± 1.18 <sup>a</sup>   | 8.83 ± 0.76 <sup>b</sup>   | <0.01   | <0.01 | 0.15      |
| MT adipose tissue            | 3.16 ± 0.35 <sup>b</sup>   | 1.75 ± 0.16 <sup>c</sup>   | 4.57 ± 0.63 <sup>a</sup>   | 2.84 ± 0.18 <sup>b</sup>   | <0.03   | <0.01 | 0.68      |
| Major white-fat <sup>3</sup> | 24.8 ± 1.7 <sup>b</sup>    | 16.6 ± 1.2 <sup>c</sup>    | 40.2 ± 3.0 <sup>a</sup>    | 27.9 ± 1.9 <sup>b</sup>    | <0.01   | <0.01 | 0.60      |
| Brown adipose tissue         | 0.57 ± 0.02 <sup>b</sup>   | 0.73 ± 0.03 <sup>a</sup>   | 0.62 ± 0.04 <sup>b</sup>   | 0.81 ± 0.04 <sup>a</sup>   | 0.08    | <0.01 | 0.72      |
| Small intestine              | 6.41 ± 0.45 <sup>b</sup>   | 5.85 ± 0.29 <sup>c</sup>   | 7.64 ± 0.33 <sup>a</sup>   | 6.41 ± 0.40 <sup>b</sup>   | 0.02    | 0.02  | 0.37      |
| Pancreas                     | 0.96 ± 0.09                | 1.06 ± 0.04                | 1.04 ± 0.04                | 1.08 ± 0.12                | 0.53    | 0.43  | 0.71      |
| Soleus muscle                | 0.160 ± 0.005 <sup>c</sup> | 0.177 ± 0.004 <sup>b</sup> | 0.186 ± 0.005 <sup>b</sup> | 0.199 ± 0.006 <sup>a</sup> | <0.01   | 0.02  | 0.67      |
| EDL muscle                   | 0.170 ± 0.003 <sup>c</sup> | 0.181 ± 0.003 <sup>b</sup> | 0.189 ± 0.004 <sup>b</sup> | 0.201 ± 0.003 <sup>a</sup> | <0.01   | <0.01 | 0.99      |
| Testes                       | 3.89 ± 0.09                | 3.79 ± 0.06                | 3.78 ± 0.06                | 3.91 ± 0.07                | 0.97    | 0.83  | 0.14      |
| Brain                        | 1.75 ± 0.06                | 1.80 ± 0.05                | 1.69 ± 0.07                | 1.83 ± 0.03                | 0.83    | 0.09  | 0.46      |

<sup>1</sup> Values are means ± SEM, n=8. Means with different superscript letters (a-c) within a row differ ( $P < 0.05$ ).

<sup>2</sup> Abbreviations used: AA, amino acid; EDL, extensor digitorum longus; EP, epididymal; HF-Ala, high-fat diet + L-alanine supplementation; HF-Arg, high-fat diet + L-arginine supplementation; LF-Ala, low-fat diet + L-alanine supplementation; LF-Arg, low-fat diet + L-arginine supplementation; MT, Mesenteric; RP, retroperitoneal; SC, subcutaneous (inguinal).

<sup>3</sup> The sum of RP, EP, SC, and MT adipose tissues.

**SUPPLEMENTAL TABLE 2**

The relative weights of tissues in 31-wk-old rats at the end of a 12-wk period of consuming low-fat or high-fat diet and water containing either 1.51% L-arginine-HCl or 2.55% L-alanine <sup>1</sup>

| Tissues         | Relative weight of tissue (tissue weight/body weight x 100) |                          |                          |                          | P value |       |           |
|-----------------|-------------------------------------------------------------|--------------------------|--------------------------|--------------------------|---------|-------|-----------|
|                 | LF-Ala <sup>2</sup>                                         | LF-Arg                   | HF-Ala                   | HF-Arg                   | Diet    | AA    | Diet x AA |
|                 | %                                                           | %                        | %                        | %                        |         |       |           |
| Heart           | 0.36 ± 0.01                                                 | 0.38 ± 0.02              | 0.38 ± 0.02              | 0.37 ± 0.02              | 0.63    | 0.68  | 0.44      |
| Lung            | 0.37 ± 0.01                                                 | 0.39 ± 0.02              | 0.39 ± 0.01              | 0.40 ± 0.01              | 0.27    | 0.41  | 0.75      |
| Liver           | 2.75 ± 0.16                                                 | 2.66 ± 0.12              | 2.72 ± 0.11              | 2.63 ± 0.04              | 0.79    | 0.45  | 0.98      |
| Spleen          | 0.18 ± 0.01                                                 | 0.18 ± 0.01              | 0.17 ± 0.01              | 0.17 ± 0.01              | 0.12    | 0.89  | 0.48      |
| Kidney          | 0.61 ± 0.02                                                 | 0.63 ± 0.02              | 0.58 ± 0.02              | 0.59 ± 0.02              | 0.07    | 0.51  | 0.79      |
| Small intestine | 1.37 ± 0.10                                                 | 1.29 ± 0.06              | 1.41 ± 0.06              | 1.24 ± 0.07              | 0.90    | 0.11  | 0.56      |
| Pancreas        | 0.21 ± 0.02                                                 | 0.23 ± 0.01              | 0.19 ± 0.01              | 0.21 ± 0.02              | 0.24    | 0.21  | 0.68      |
| Testes          | 0.83 ± 0.02 <sup>a</sup>                                    | 0.83 ± 0.02 <sup>a</sup> | 0.71 ± 0.02 <sup>b</sup> | 0.75 ± 0.02 <sup>b</sup> | <0.01   | 0.11  | 0.64      |
| Brain           | 0.37 ± 0.01 <sup>b</sup>                                    | 0.40 ± 0.01 <sup>a</sup> | 0.31 ± 0.01 <sup>c</sup> | 0.35 ± 0.01 <sup>b</sup> | <0.01   | <0.04 | 0.37      |

<sup>1</sup> Values are means ± SEM, n=8. Means with different superscript letters (a-c) within a row differ ( $P < 0.05$ ).

<sup>2</sup> Abbreviations used: AA, amino acid; HF-Ala, high-fat diet + L-alanine supplementation; HF-Arg, high-fat diet + L-arginine supplementation; LF-Ala, low-fat diet + L-alanine supplementation; LF-Arg, low-fat diet + L-arginine supplementation.

**SUPPLEMENTAL TABLE 3**

Serum concentrations of hormones in 31-wk-old rats at the end of a 12-wk period of consuming low-fat or high-fat diet and water containing either 1.51% L-arginine-HCl or 2.55% L-alanine <sup>1</sup>

| Variables                    | Concentrations in serum |             |             |             | P value |                 |           |
|------------------------------|-------------------------|-------------|-------------|-------------|---------|-----------------|-----------|
|                              | LF-Ala                  | LF-Arg      | HF-Ala      | HF-Arg      | Diet    | AA <sup>2</sup> | Diet x AA |
| Adiponectin, µg/L            | 4.95 ± 0.30             | 5.64 ± 0.33 | 4.98 ± 0.23 | 5.03 ± 0.13 | 0.26    | 0.16            | 0.22      |
| Growth Hormone, µg/L         | 4.82 ± 1.18             | 4.84 ± 1.37 | 4.62 ± 1.45 | 5.06 ± 0.96 | 0.99    | 0.88            | 0.89      |
| Corticosterone, µg/L         | 64.9 ± 6.9              | 64.0 ± 16.2 | 62.2 ± 12.0 | 60.9 ± 17.2 | 0.84    | 0.94            | 0.99      |
| Total triiodothyronine, ng/L | 722 ± 48                | 691 ± 45    | 701 ± 59    | 687 ± 48    | 0.83    | 0.68            | 0.88      |
| Total thyroxine, ng/L        | 33.9 ± 2.2              | 31.2 ± 0.9  | 32.2 ± 1.0  | 32.0 ± 1.8  | 0.77    | 0.36            | 0.43      |

<sup>1</sup> Values are means ± SEM, n=8.

<sup>2</sup> Abbreviation used: AA, amino acid; HF-Ala, high-fat diet + L-alanine supplementation; HF-Arg, high-fat diet + L-arginine supplementation; LF-Ala, low-fat diet + L-alanine supplementation; LF-Arg, low-fat diet + L-arginine supplementation.
